# Supplementary material
Source: HighWire-hosted journal article supplement (https://ajnr-sso.highwirestaging.com/highwire/filestream/52210/field_highwire_adjunct_files/0/2075_tables.pdf)
Supplement: 2075_tables.pdf [file 2075_tables.pdf]

**On-line Table 1: The mean CNR in all measured coronary artery segments**

| Vessel                               | Mean CNR   |
|--------------------------------------|------------|
| Proximal RCA                         | 12.5 ± 4.0 |
| Distal RCA                           | 11.8 ± 3.6 |
| LM                                   | 12.1 ± 4.1 |
| Proximal LAD                         | 12.1 ± 4.1 |
| Distal LAD                           | 11.3 ± 3.9 |
| Proximal LCX                         | 11.8 ± 3.8 |
| Distal Left LCX                      | 11.2 ± 3.5 |
| CCA                                  | 10.6 ± 3.6 |
| ICA                                  | 11.1 ± 3.7 |
| Ascending aorta                      | 12.3 ± 3.9 |
| Descending aorta                     | 11.9 ± 3.6 |
| Superior vena cava                   | 8.4 ± 4.3  |
| Injection-side internal jugular vein | 4.2 ± 2.7  |
| Contralateral internal jugular vein  | 4.3 ± 2.5  |
| Contralateral subclavian vein        | 3.5 ± 1.5  |

**On-line Table 2: Optimal cardiac reconstruction phases<sup>a</sup>**

| Cardiac Phase<br>(% of R-R Interval) | RCA                                   |                             | LAD                                   |                             | LCX                                   |                             |
|--------------------------------------|---------------------------------------|-----------------------------|---------------------------------------|-----------------------------|---------------------------------------|-----------------------------|
|                                      | No. of Assessable Vessels<br>(n = 79) | % of Total Vessels Assessed | No. of Assessable Vessels<br>(n = 79) | % of Total Vessels Assessed | No. of Assessable Vessels<br>(n = 79) | % of Total Vessels Assessed |
| 35                                   | 4                                     | 5.1                         | 2                                     | 2.5                         | 1                                     | 1.3                         |
| 40                                   | 3                                     | 3.8                         | 3                                     | 3.8                         | 2                                     | 2.5                         |
| 45                                   | 17                                    | 21.5                        | 12                                    | 15.2                        | 12                                    | 15.2                        |
| 50                                   | 6                                     | 7.6                         | 6                                     | 7.6                         | 6                                     | 7.6                         |
| 55                                   | 4                                     | 5.1                         | 3                                     | 3.8                         | 3                                     | 3.8                         |
| 60                                   | 3                                     | 3.8                         | 1                                     | 1.3                         | 2                                     | 2.5                         |
| 65                                   | 4                                     | 5.1                         | 1                                     | 1.3                         | 1                                     | 1.3                         |
| 70                                   | 9                                     | 11.4                        | 8                                     | 10.1                        | 7                                     | 8.9                         |
| 75                                   | 24                                    | 30.4                        | 32                                    | 40.5                        | 34                                    | 43.0                        |
| 80                                   | 4                                     | 5.1                         | 6                                     | 7.6                         | 7                                     | 8.9                         |
| 85                                   | 0                                     | 0.0                         | 2                                     | 2.5                         | 1                                     | 1.3                         |
| 90                                   | 0                                     | 0.0                         | 1                                     | 1.3                         | 1                                     | 1.3                         |
| 95                                   | 1                                     | 1.3                         | 2                                     | 2.5                         | 2                                     | 2.5                         |

<sup>a</sup>The cardiac phase that provided the highest quality images for each artery was recorded. The phase most often used for all 3 arteries was at 75% of the R-R interval. The phase next most often used was at 45% of the R-R interval.

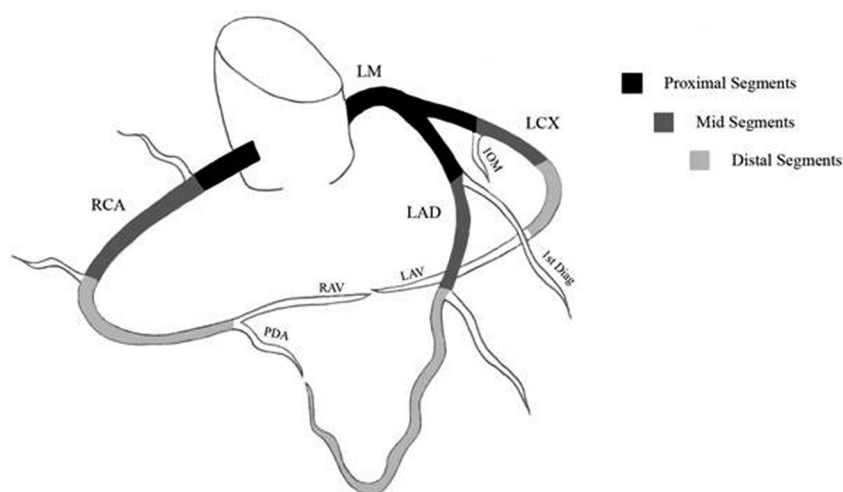

**On-line Fig 1.** Diagram of the coronary artery tree. The following 10 coronary artery segments were assessed for image quality: the proximal RCA, mid-RCA, distal RCA, the LM, proximal LAD, mid-LAD, distal LAD, proximal LCX, mid-LCX, and distal LCX. In these segments, the CNRs were also calculated, along with the following arteries: the 1st Diag, first IOM, RAV or LAV, and PDA.

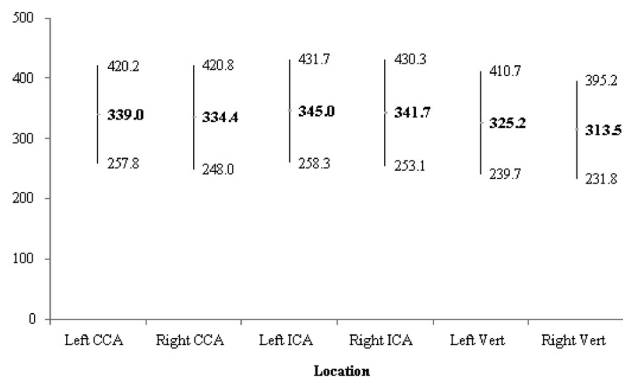

**On-line Fig 2.** Mean attenuation of the major neck arteries. The intraluminal mean attenuation level is shown in bold (center value), with 1 SD above and below.

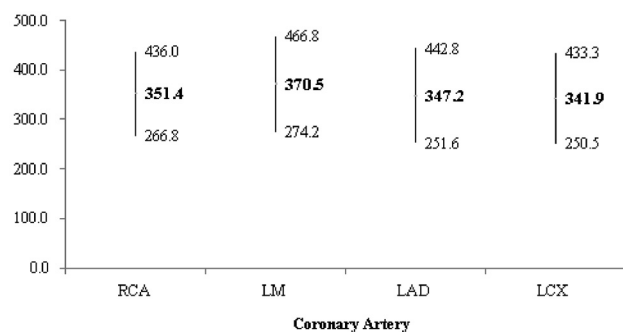

**On-line Fig 3.** Mean attenuation in the major coronary arteries. The intraluminal mean attenuation level is shown in bold (center value), with 1 SD above and below.

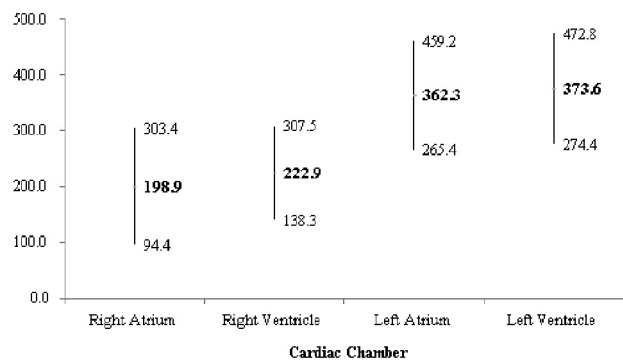

**On-line Fig 4.** Mean attenuation level in the 4 cardiac chambers. The mean attenuation level for each cardiac chamber is shown in bold (center value), with 1 SD above and below.
